# Molecular investigations on a chimeric strain of *Staphylococcus aureus* sequence type 80

Darius Gawlik <sup>1,2</sup> (d.gawlik@ptc-phage.com)

Antje Ruppelt-Lorz <sup>3</sup> (antje.ruppelt@gmx.de)

Elke Müller <sup>4,6</sup> (elke.mueller@leibniz-ipht.de)

Annett Reißig <sup>4,6</sup> (annett.reissig@leibniz-ipht.de)

Helmut Hotzel <sup>7</sup> (helmut.hotzel@fli.de)

Sascha D. Braun <sup>4,6</sup> (sascha.braun@leibniz-ipht.de)

Bo Söderquist <sup>8</sup> (bo.soderquist@regionorebrolan.se)

Albrecht Ziegler-Cordts <sup>9</sup> (ziegler.albrecht@gmail.com)

Ralf Ehrlich <sup>4,5,6</sup> (ralf.ehrlich@leibniz-ipht.de)

Stefan Monecke <sup>3,4,6</sup> (stefan.monecke@leibniz-ipht.de) \*

\*Corresponding author

## Author details

<sup>1</sup> Institute of Infectious Diseases and Infection Control, University Hospital, Jena, Germany

<sup>2</sup> PTC - Phage Technology Center GmbH, Bönen

<sup>3</sup> Institute for Medical Microbiology and Hygiene, Technical University of Dresden, Dresden, Germany

<sup>4</sup> Leibniz Institute of Photonic Technology (IPHT), Jena, Germany

<sup>5</sup> Institute of Physical Chemistry, Jena University, Jena, Germany

<sup>6</sup> InfectoGnostics Research Campus, Jena, Germany

<sup>7</sup> Friedrich-Loeffler-Institut, Institute of Bacterial Infections and Zoonoses, Jena, Germany

<sup>8</sup> School of Medical Sciences, Department of Laboratory Medicine, Clinical Microbiology, Faculty of Medicine and Health, Örebro University, SE-701 82 Örebro, Sweden

<sup>9</sup> T-Systems Multimedia Solutions GmbH, Dresden, Germany

**Keywords :** *Staphylococcus aureus*, clonal complex 80, microarray, next generation sequencing, horizontal gene transfer, recombination

## 1 **Abstract**

2 **An Eritrean patient was admitted with suspected tuberculous cervical lymphadenitis.**  
3 **While no mycobacteria were detected in pus from this process, culture yielded PVL-**  
4 **positive, methicillin-susceptible *Staphylococcus aureus*. Microarray hybridisation**  
5 **assigned the isolate to clonal complex (CC) 80 but revealed unusual features, including**  
6 **the presence of the ORF-CM14 enterotoxin homologue and of an ACME-III element as**  
7 **well as the absence of *etD* and *edinB*. The isolate was subjected to both, Illumina and**  
8 **Nanopore sequencing allowing characterisation of deviating regions within the strain’s**  
9 **genome. Atypical features of this strain were attributable to the presence of two genomic**  
10 **regions that originated from other *S. aureus* lineages and that comprised, respectively,**  
11 **3% and 1.4% of the genome. One deviating region extended from *walJ* to *sirB*. It**  
12 **comprised ORF-CM14 and the ACME-III element. A homologous, but larger fragment**  
13 **was also found in an atypical *S. aureus* CC1/ST567 strain whose lineage might have**  
14 **served as donor of this genomic region. This region itself is a chimera comprising**  
15 **fragments from CC1 as well as fragments of unknown origin. The other region of**  
16 **another 3% of the genome comprised the region from *htsB* to *ecfA2*. It was very similar**  
17 **to CC1 sequences. This suggests either an incorporation of CC1 DNA into the study**  
18 **strain, or it might alternatively suggest a recombination event affecting “canonical”**  
19 **CC80. As the study strain bears witness of several recombination events, such complex**  
20 **and large-scale events cannot be rare and exceptional, despite a mainly clonal nature of**  
21 ***S. aureus*. Although the exact mechanism is not yet clear, chimerism seems to be an**  
22 **additional pathway in the evolution of *S. aureus*, possibly being responsible for the**  
23 **transmission also of virulence and resistance factors. An organism that can shuffle, swap**  
24 **or exchange major parts of its genome by a yet unknown mechanism would have an**  
25 **evolutionary advantage compared to a strictly clonal organism.**

## 26 **Introduction**

27 *Staphylococcus aureus* (*S. aureus*) is a versatile pathogen that colonises or infects a large  
28 fraction of the world's human population as well as several species of wild and domestic  
29 animals. Thus, it can asymptotically colonise its carriers, or alternatively cause various  
30 infections ranging from superficial skin and soft tissue infections to serious bacteremia  
31 including infective endocarditis. Many of its virulence factors are variably present and their  
32 genes are localized on mobile genetic elements such as plasmids, phages, transposons or on  
33 pathogenicity islands. In recent decades, some strains of *S. aureus* acquired resistance to  
34 many or most antibiotics. Again, resistance genes are localized on mobile, or potentially  
35 mobile, genetic elements such as staphylococcal chromosomal cassette *mec* (SCC*mec*)  
36 cassettes. Despite a vast variety of variable, mobile elements, and despite some incremental,  
37 mutation-driven variation, the overall structure of the *S. aureus* genome is conservative with  
38 all core genomic elements being present in all strains in one uniform sequential arrangement.  
39 Multilocus sequence typing (MLST) enables the unambiguous assignment of isolates to  
40 taxonomic units, sequence types (ST) and clonal complexes (CC), based on numbered alleles  
41 of seven housekeeping genes assuming that these genes cannot be lost or truncated because of  
42 their crucial function and that the accumulation of mutations in their sequences is purely a  
43 function of time. This lead to a model of a clonal evolution of the *S. aureus* core genome that  
44 is driven by a time-dependent accumulation of single point mutations allowing classification  
45 based on a few marker genes into a limited number of clonal complexes comprising a number  
46 of sequence types that differ only in random mutations in these marker genes as well as of  
47 others.

48 However, some *S. aureus* strains show features that cannot be explained neither by  
49 accumulation of single point mutations nor by acquisition or loss of mobile genetic elements.  
50 For instance, there is a Russian CC8 strain in which nearly half of the genome is inverted [1].

51 Other strains show evidence of large-scale recombination events, with considerably large  
52 fragments of their genomes originating from other lineages and being inserted at the  
53 appropriate position of the recipient strain. Such a phenomenon was first postulated for ST239  
54 strains, in which deviant alleles of *arcC* and *spa*, *aur*, *clfB* and *isaB*, of the capsule type (5  
55 instead of 8) and the presence of *cna* indicate an integration of a CC30 DNA fragment of  
56 approximately 635,000 base pairs (or ca. 20% of the genome) into a CC8 recipient strain, with  
57 the integration site being localised around *oriC* [2]. Another strain, ST2249, harbours ST239  
58 DNA comprising fragments of both, CC8 and CC30 that is integrated into a CC45 genome  
59 [3]. Further examples for chimeric strains are ST34 and ST42 (in which CC10 fragments are  
60 integrated into CC30 genomes) [2] or CC398 strains that harbour fragments of CC9 origin [4,  
61 5]. Such observations indicate that large scale recombination events played a role in driving  
62 the evolution of *S. aureus* but the underlying molecular mechanisms are not yet described.  
63 In the present paper, we describe another, new chimeric strain that comprises a backbone of  
64 CC80 genomic DNA and two separate large inserts that attracted attention because of a  
65 presence of ORF-CM14 and an absence of *edinB* and *etD*.

66 *S. aureus* CC80 is a lineage that is commonly associated with recurrent and/or severe skin and  
67 soft tissue infections (SSTI) since a majority of isolates carries the phage-borne Panton-  
68 Valentine leukocidin (PVL), a virulence factor associated with SSTI. One PVL-positive,  
69 methicillin-resistant CC80 strain, with a *SCCmec* IVc element, is sporadically found in  
70 Western Europe [6-14] while it is widespread in Mediterranean countries including Greece  
71 [15, 16], Turkey [17], Lebanon [18], Malta [19], Tunisia [20, 21] and Algeria [22-24] as well  
72 as in the Middle East/Arabian Gulf regions [25-28]. It can also commonly be found in  
73 European travellers to these regions [10, 17]. Methicillin-susceptible CC80 strains are  
74 uncommon but geographically widespread in Africa [29-31] from where this lineage  
75 originated [14].

76 The isolate described herein was initially subjected to microarray hybridisation, primarily for  
77 typing and detection resistance and toxin genes. The procedure revealed unusual features that  
78 could be explained by a large-scale horizontal gene transfer. This observation prompted  
79 further investigations including Illumina and Nanopore sequencing in order to map the entire  
80 genome of the isolate and a search for the donor strain of regions assumed to be introduced by  
81 the gene transfer.

82

## 83 **Material and Methods**

### 84 **Clinical background and isolates**

85 An Eritrean patient was admitted in 2015 to the Dresden University Hospital (Dresden,  
86 Saxony, Germany) with a cervical skin and soft tissue infection that originally was suspected  
87 to be suppurative tuberculous lymphadenitis. While no mycobacteria were detected (neither  
88 immediately by microscopy after staining for acid-fast bacilli nor subsequently in MGIT and  
89 Ogawa cultures), culture of pus from this process yielded a PVL-positive, methicillin-  
90 susceptible *S. aureus* (ANR570100).

91 A second isolate was further characterised because of certain similarities with the study  
92 isolate (see below). It was isolated in 2002. It originated from an approximately 50 years old  
93 female patient with lobar pneumonia probably secondary to an influenza B infection. She was  
94 a Swedish citizen and denied any traveling outside Sweden.

### 95 **Microarray-based typing**

96 The *S. aureus* isolates were initially characterized using different DNA microarray-based  
97 assays. Probes, primers as well as amplification and hybridization protocols have previously  
98 been described in detail [32-34].

### 99 **Illumina sequencing**

100 Genomic DNA for whole-genome sequencing was prepared from culture on Columbia blood  
101 agar incubated overnight at 37°C. DNA was prepared using the Qiagen DNA isolation kit  
102 (Qiagen, Hilden, Germany) according to manufacturer's instructions after an enzymatic lysis  
103 step with lysostaphin, lysozyme and RNase as previously described [32-34]. Afterwards,  
104 whole-genome sequencing was carried out using the Illumina HiSeq2500 genome analyser

105 (Illumina HiSeq 2500 platform, Illumina, Essex, UK). The reads were assembled to contigs  
106 using SPAdes.

107 Sequencing of the two strains was performed at two geographically distant facilities and at  
108 different dates (Jena, Germany, and Örebro, Sweden, in spring and autumn 2018,  
109 respectively), ruling out any possibility of carry-over contaminations.

## 110 **Nanopore sequencing**

111 The Nanopore Oxford MinION platform was used for whole-genome sequencing. Briefly, no  
112 size selection was performed and the DNA library was generated using the native barcoding  
113 expansion kit EXP-NBD103 and the Nanopore sequencing kit SQK-LSK109 (Oxford  
114 Nanopore Technologies, Oxford, UK) according to manufacturer's instructions. The used  
115 flow cell FLO-MIN106 (R9-Version) was primed by the flow cell priming kit EXP-FLP001  
116 (Oxford Nanopore). The protocol "1D Native barcoding genomic DNA" was used in version  
117 NBE\_9065\_v109\_revB\_23May2018 (Last update: 03/09/2018). The albacore basecaller  
118 (Oxford Nanopore) translated the minion raw data (FAST5) into short quality tagged  
119 sequence reads (FASTQ). After barcode trimming using Poreshop  
120 (<https://github.com/rrwick/Porechop>, release v0.2.4), canu (<https://github.com/marbl/canu>,  
121 release v1.7.1) was used to assemble the short reads. After nano-polishing  
122 (<https://github.com/jts/nanopolish>, release v0.11.3), the corrected sequence data were used for  
123 a direct comparison to the Illumina sequence data (see below).

## 124 **Bioinformatic analysis**

125 Iterated BLAST searches were used for analysis of individual contigs in this genome  
126 (<https://blast.ncbi.nlm.nih.gov/Blast.cgi>). This analysis was conducted using automated  
127 scripts for full text comparison and BLAST analysis and an in-house database of known,  
128 annotated and previously identified *S. aureus* genomes, genes and fragments to the query

129 sequence. This enables the determination of identity, gene content, clonal parentage and of  
130 position within the genome of each contig given the constant order of core genomic genes in  
131 *S. aureus*.

132 Contigs were compared to the CC80 strain 11819-97, GenBank  
133 CP003194.1/SAMN02603886. This is a PVL-positive strain with a SCC*mec* IV element and –  
134 as essentially all canonical CC80 strains – with an *etD/edinB* pathogenicity island. It can be  
135 regarded as representative for CC80. Its genome has a size of 2,846,546 nt and an average  
136 G/C content of 32.9%. They were also compared to the long-known CC8 strain COL,  
137 GenBank CP000046, and to MW2, BA000033, as reference sequence for CC1.

138 Finally, Nanopore and Illumina sequences were aligned manually for reasons discussed  
139 below.

140



## 141 **Results**

### 142 **Comparison of methods**

143 A total of 36 Illumina contigs was considered to be chromosomal. Another one was assumed  
144 to contain plasmid-borne sequences (including *blaZ* and *cadX*; see below). The average  
145 fragment size of the library was 220 nt. Visual inspection and comparison of these contigs to  
146 the Nanopore sequences revealed faulty assemblies of four contigs that needed to be split into  
147 two “sub-contigs” each in order to allow alignment to the Nanopore sequence. Most  
148 significantly, Illumina/velvet failed to resolve a ca. 5,000 nt region within the ACME-III  
149 element that consisted of repetitive sequences. On the other hand, Nanopore showed a poor  
150 resolution of poly-A and poly-T sequence fragments resulting in the loss of approximately  
151 15,800 nucleotides across the entire chromosome.

### 152 **Characterisation of the clinical isolate**

153 Array hybridization revealed the presence of the enterotoxin homologue ORF-CM14 and of  
154 an ACME-III element, as well as the absence of *edinB* and *etD*. Otherwise, the isolate  
155 matched previously characterized CC80 strains (see Supplemental file 1). In order to explain  
156 these discrepancies, it was sequenced using both, Illumina and Nanopore methods and  
157 resulting sequences were aligned resulting in a continuous chromosome with a total length of  
158 2,789,663 nt and an overall G/C content of 32.98%. MLST was performed based on the  
159 consensus genome sequence and it yielded ST-80 (*arcC*-1, *aroE*-3, *glpF*-1, *gmk*-14, *pta*-11,  
160 *tpi*-51, *yqiL*-10).

161 A comparison of core chromosomal genes revealed that two regions in ANR570100 differed  
162 from CP003194. When visually inspecting the mapping of the ANR570100 reads to

163 CP003194, in those two regions we were able to identify the true extend of these deviant  
164 regions (Figure 1).

## 165 **Deviating Region 1**

166 Deviating Region 1 extends from *walJ* (locus tag MS7\_0024 in CC80, CP003194, or  
167 respectively SACOL0023 in CC8, CP000046) with a putative recombination sites located in  
168 the intergenic region between *walL* and *walJ*. It extends to certainly include *sirB* (MS7\_0106,  
169 SACOL0098), possibly even to *sbnE* (MS7\_0112, SACOL0104) although the differences to  
170 canonical CC80 sequences are not large enough to clearly determine a recombination site. It  
171 can be estimated at 84,363 nt (based on a consensus of the Illumina and the Nanopore  
172 sequences, and including *walJ* to *sirB*). This corresponds to roughly 3% of the genome and  
173 includes *ca.* 34,000 nt belonging to the ACME-element.

174 The gene content of Deviating Region 1 is described in Table 1 where it is also compared to a  
175 CC80 reference sequence CP003194 as well as to 02T-671.

176 Deviating Region 1 consists of four different fragments. The first comprises the genes  
177 between *walJ* (MS7\_0024; SACOL0023) and *orfX*.

178 The second one is an ACME-III element including the *opp* operon. This is a potentially motile  
179 element and thus it is not necessarily connected to the genomic replacement in this strain. It  
180 will be discussed below.

181 A third fragment includes, among other genes, the enterotoxin homologue ORF-CM14. It  
182 extends to Q7A890/Q2YUT2 (MS7\_0086/MS7\_0087; SACOL0076/SACOL0077). This  
183 fragment does not contain the enterotoxin H gene *seh* or a *seh*-derived pseudogene  
184 (MS7\_0080) which are characteristic for CC1 or CC80, respectively.

185 A forth fragment of Deviating Region 1 includes the gene encoding staphylococcal protein A.  
186 It can be assigned to RIDOM *spa* type t1849; 07-23-34-33-13. This *spa* type is related, but  
187 not identical, to both, those of CC1 (such as t127; 07-23-21-16-34-33-13) and CC80 (such as  
188 t044; 07-23-12-34-34-33-34). The RIDOM database shows 10 matches  
189 (<https://spa.ridom.de/spa-t1849.shtml>; as of 2020, April 3rd), including three belonging to a  
190 German project on characterisation of African *S. aureus* isolates [29, 35, 36] but without  
191 disclosing their MLST types or further details. Several other genes in this fragment match  
192 CC1 sequences (see Table 1).

### 193 **The SCC element as part of Deviating Region 1**

194 Deviating Region 1 also comprises *orfX* together with integrated SCC elements. The reference  
195 sequence CP003194 contains a SCC*mec* IVc element and most published isolates and  
196 sequences of CC80 harbour SCC*mec* IVa or IVc elements. These are absent from  
197 ANR570100. Instead, it carries an SCC element without *mecA/C* genes.

198 The gene content of the SCC element is summarized in Table 2. In short, it consists of

- 199 - a type II restriction-modification system,
- 200 - *ccrA/BI* recombinase genes and adjacent genes showing some similarity or  
201 relationship to SCC*mec* IX sequences (strain JCSC6690, GenBank AB705452.1),
- 202 - a large gene with repetitive sequences that is very similar to the gene encoding a  
203 hypothetical protein DLJ55\_14705 in the chromosomal DNA of strain MOK042  
204 (GenBank CP029627.1) as well as on a plasmid of a ST508/CC45 strain, AR\_0471  
205 (chromosome CP029652.1, plasmid CP029650.1)
- 206 - and an oligopeptide permease operon, *i.e.*, *opp* genes or ACME-III as well as some  
207 genes for “putative proteins” as known from the ST42 strain C427, GenBank ACSQ.

208 A search of the short read archive of GenBank revealed two near-identical sequences of  
209 deviant CC80 strains, one of which (SAMEA48342418) lacked ACME-III while the other one  
210 (SAMEA3671725) harboured it, indicating a variable presence of this element in CC80  
211 [ORF-CM14+] strains. When performing a BLAST search with the NCBI GenBank, no  
212 significant hits over the entire length of the SCC element were obtained indicating that this  
213 element has not yet been observed, although most of its genes have already been found in  
214 other SCC elements.

### 215 **Identification and characterisation of the ST567 isolate 02T-671 as a** 216 **potential donor of Deviating Region 1**

217 The observation of the enterotoxin homologue ORF-CM14 rather than of the enterotoxin H  
218 gene *seh* normally present in canonical CC1 strains, followed by a set of CC1-like genes  
219 strongly suggests that Deviating Region 1 is of chimeric origin itself. Our database of ca.  
220 25,000 microarray hybridization profiles was searched for potential donors of Deviating  
221 Region 1, *i.e.*, for strains that are chimeras harbouring ORF-CM14 in an otherwise CC1-like  
222 core genomic backbone. Only one isolate, 02T-671 a deviant, ST567/CC1 (MLST profile 10-  
223 1-1-1-1-1-1, *spa* type, t1242; 07-23-12-34-34-16-34-33-13) strain matched these criteria.  
224 However, since no genome sequence was available yet for that strain the isolate that was  
225 typed by microarray based-assays was also sequenced using Illumina Miseq.

226 02T-671 was a PVL-positive CC1 MSSA that differed from canonical CC1 in several features  
227 including a presence of the ORF-CM14 enterotoxin homologue and an absence of *seh*. Other  
228 differences compared to canonical CC1 strains were the presence of deviant alleles of *aur* and  
229 *isaB* as well as an absence of *cna* and Q2G1R6/*cstB* (BA000033.2: 66419-67753). It also  
230 harboured an ACME-III element (*opp* genes and *ccrABI*). The MLST marker *arcC* was  
231 different compared to ST1 (*arcC* 10 instead of *arcC* 1) but this difference is due to a single  
232 nucleotide polymorphism indicating mutation rather than recombination.

233 These observations are consistent with integration of a large alien insert around *oriC*.  
234 Excluding the ACME-III element, this insert can therefore be estimated to comprise roughly  
235 150,000 nt, ranging from between *arcC* and *aur* across *oriC* and *orfX* to Q7A890/Q2YUT2  
236 (see Figure 1).

237 Deviating Region 1 of ANR570100 and the corresponding region in the ST567 isolate 02T-  
238 671 can be considered identical. This includes the gene content and the gene sequences, the  
239 presence and sequence of an ACME-III element and the fault line separating a region of  
240 unknown origin from CC1-like sequences between Q7A890 and Q2YUT2.

241 The ACME-III elements of ANR570100 and 02T-671 were largely identical to each other in  
242 both, gene content and gene sequences (see Table 2).

243 Therefore, we assume the lineage or strain represented by isolate 02T-671 to be the donor of  
244 Deviating Region 1 in the lineage of ANR570100. However, the lineage of 02T-671 is itself  
245 of chimeric nature comprising a large insert of DNA from a yet unidentified donor into a CC1  
246 genome.

## 247 **Deviating Region 2**

248 Deviating Region 2 (Table 3, Figure 1) extended from *htsB* (MS7\_2199, SACOL2166) to  
249 Q8NVB9 (MS7\_2323, SACOL2297) or to *ecfA2* (MS7\_2242; SACOL2211) having a size of  
250 33,939 to 38,645 nt (1.2 to 1.4% of the genome, which is clearly smaller than the  
251 corresponding fragment of the CC80 reference sequence which encompasses as much as  
252 115,604 nt). The reason is that it spans the integration site that in canonical CC80 harbours a  
253 motile genomic element comprising of *hsdS*, *hsdM*, *etD*, F3TKB7, *edinB* and F5W4X2  
254 (MS7\_2226 to MS7\_2231). This element is absent from ANR570100. It is also absent from  
255 all CC1 sequences. This region also comprises a gene cluster from *rplQ* (MS7\_2243;  
256 SACOL2212) to *rpsJ* (MS7\_2271; SACOL2240) encoding several ribosomal proteins. These

257 genes are conserved at a very high degree in all sequences of *S. aureus* so that there was not  
258 enough variation for meaningful SNP analysis. However, when BLASTing  
259 (<https://blast.ncbi.nlm.nih.gov/Blast.cgi>) contig 16 (that entirely is a part of Deviating Region  
260 2; the others are on 21 and 19), the five highest scoring matches over the entire length of the  
261 query sequence (68,165 nt) are CC1 genomes (with, e.g., 23 nt mismatches and 2 nt gaps for  
262 BX571857.1). In general, this region in ANR570100 is more related to CC1 than to canonical  
263 CC80 sequences. It also appears to be closer to 02T-671 than to MW2 but given the overall  
264 similarity of all sequences concerned, this is hard to assess. The adjacent regions, up- and  
265 downstream of Deviating Region 2, are very similar in ANR570100, 02T-671 as well as  
266 reference CC1 and CC80 sequences.

### 267 **The *hla* gene and its neighbouring genes**

268 When comparing the sequence as well as the hybridization profile of ANR570100 to the  
269 CC80 reference sequence, the absence of the *hla* gene and its neighbouring genes (A5IS45,  
270 Q6GHS5, A5IS47, A6U0Y3, Q2FZB4, *i.e.*, MS7\_1116 to MS7\_1120 or SACOL1171 to  
271 SACOL1175) can be detected. This is presumably the result of homologous recombination  
272 between extended repeat sequences flanking the *hla* gene cluster at both of its ends. The  
273 presence of *hla* appears to be variable in the deviant CC80 lineage; SAMEA48342418 also  
274 lacks *hla* while it is present in SAMEA3671725.

### 275 **Prophages**

276 When excising the phage sequence (Contig-0007:RC, positions 133,678 to end and Contig-  
277 0012 positions 1 to 42,938) and performing a NCBI Blast search, the four best matches, with  
278 identities of 99.97%, are all PVL phages from CC80 strains, phiSa2wa\_st80 (MG029515.1),  
279 NCTC13435 (LN831036.1), GR2 (CP010402.1) and 11819-97 (CP003194.1).

280 The PVL prophage in ANR570100 is integrated into the same site of the chromosome as the  
281 one in 11819-97 (CP003194.1). The prophage sequences from both strains are co-linear and  
282 they comprise the same set of genes.

283 The *hly*-converting phage in ANR570100 differed from CP003194.1, although the virulence-  
284 associated genes it carried (*scn*, *sak*) were the same. A NCBI Blast of Contig-0009RC  
285 positions 81,223 to 123,488 (as of August 2019) yielded as best matches (with more than  
286 99.6% identity) the *hly*-converting phages from BB155 (LN854556.1) and 55-99-44  
287 (CP024998.1) and SA17\_S6 (CP010941.1). They all belong to ST152  
288 ([https://pubmlst.org/bigdb?db=pubmlst\\_saureus\\_seqdef&page=sequenceQuery](https://pubmlst.org/bigdb?db=pubmlst_saureus_seqdef&page=sequenceQuery)). This might  
289 be attributed to a co-existence and co-evolution of the deviant CC80 lineage and of CC152 in  
290 the same geographic region, as the latter CC is known to be predominant at least in parts of  
291 Africa [38-44].

## 292 **Resistance genes**

293 ANR570100 carried the *blaZ/I/R* operon and a cadmium resistance operon *cadD/cadX*,  
294 presumably on a plasmid. Genes *aphA3* and *sat* (neomycin and streptothricin resistance) as  
295 well as *far1/fusB* and *tet(K)* that frequently can be encountered in canonical CC80, being  
296 situated within *SCCmec* elements or on plasmids, were absent.

297

## 298 **Discussion**

299 We identified a virulent, PVL-positive CC80 MSSA which differed in several key features  
300 from canonical CC80 strains and sequences. Its analysis was performed using three different  
301 methods, array hybridisation, Illumina and Nanopore sequencing. While array hybridisation  
302 yields less information than sequencing, it can be routinely performed automatically and  
303 economically on high numbers of clinical isolates that, in the present case, allowed the  
304 identification of the initial isolate ANR570100 as being of special interest as well as of  
305 02T671 as putative donor. Illumina sequencing provided short reads of high quality  
306 sequences, but it has difficulties with repetitive sequences which, as the most relevant  
307 problem in the current project, led to a virtual miss of DLJ55\_14705 within the ACME-III  
308 element. Nanopore sequencing proved unreliable with regard especially to poly-T and poly-A  
309 sequences, but it can handle repetitive sequences much better which in *S. aureus* also include  
310 MSCRAMM genes such as *spa*.

311 Differences of the target strain to reference sequences of CC80 include two large inserts of  
312 DNA from other *S. aureus* lineages, both combined accounting for about 8% of the genome of  
313 the strain. While one was located close to *oriC* which appears to be a hotspot for  
314 chromosomal replacements (see Introduction), the other one was localised at a distant  
315 position. The mechanism for these gene transfers is yet unknown. With two large  
316 replacements being present in one single isolate, we assume that such-large scale horizontal  
317 gene transfers might be more common in *S. aureus* than previously perceived, and that the  
318 resolution of MLST with seven markers is not high enough to identify all chimeric strains.  
319 However, the combination and interaction of microarray-based assays and NGS allows the  
320 reliable identification of such strains [37].

321 The most striking features of ANR570100, however, are large regions in its genome that  
322 clearly differ from other CC80 sequences. As described above, Deviating Region 1 in the



323 isolate ANR570100 comprises sequences identical to the ones from the atypical CC1/ST567  
324 strain 02T671. This includes an ACME-III element. It also includes a stretch of DNA  
325 upstream and downstream of ACME-III with the latter part including ORF-CM14.  
326 Theoretically, this might give a hint on the putative donor of Deviating Region 1.

327 Possible donors for ORF-CM14 to both, 570100 and 02T671 obviously must include strains  
328 from ORF-CM14 positive lineages that are ST12, ST71, ST93, ST121, ST509, ST567,  
329 CC772, CC705, ST707, ST760, ST816, ST848, ST1094, ST1643, ST2272, ST2425, ST2616  
330 and ST2972 (based on published sequences and author's own microarray data).  
331 Unfortunately, genome sequences of several of these STs are not available and those that are  
332 available do not match fully the sequence of Deviating Region 1. When comparing ORF-  
333 CM14 sequences alone, those of JKD6159; CP002114.2 [76914-77693] (ST93) and SS-015;  
334 FQIU01000002 [597790-598569] (ST2972) are the most closely related ones. When  
335 performing BLAST on the non-CC1-region of 02T671, the highest scoring hits are two  
336 ST2272 sequences (AP019712.1 and AP019713.1). When directly comparing sequences in  
337 question, the differences are large enough to indicate that ST2272 was not likely to be the  
338 direct donor (with an average difference of 1.8% for *dnaA*, *dnaN*, *yaaA*, *recF*, *gyrB*, *gyrA*,  
339 *nnrD*, *hutH*, *serS*, *azlC*, *sam-L1*, *metX*, *yybS*, *gdpP*, *rplI*, *dnaC*, *purA*, *walR*, *walk*, *walH*, *wall*,  
340 *walJ*, *sasH*, Q6GKL1, Q6GKL6, ORF-CM14, *dusC*, A6TXM6, A6QD71, Q6GKK6 and  
341 Q2YUT2 from Tokyo12482, GenBank AP019713.1, to 02T671).

342 In both strains, ANR570100 and 02T671, a fault-line can be observed between Q7A890 and  
343 Q2YUT2 separating downstream sequences of unknown origin from those upstream that are  
344 rather unambiguously related to CC1 (*i.e.*, the right border between “red” and “blue” sectors  
345 in Figure 1 and the last two columns of Table 1). This means Deviating Region 1 of  
346 ANR570100 includes the fault line separating the alien insert in 02T671 from the canonical  
347 CC1 core genome of that strain. This makes it very likely that a 02T671-like strain was indeed

348 the donor of Deviating Region 1, and that this region itself is of chimeric nature, spanning  
349 CC1 and non-CC1 sequences that together form the 02T671-like donor strain as well as the  
350 mobile SCC/ACME-III element (see Figure 1). Unfortunately, the upstream fault line  
351 separating CC1 from CC80 sequences in ANR570100 (between *sirB* and *spa* or *sbnE*) cannot  
352 exactly been determined because of the general similarity or relatedness of CC1 and CC80.

353 Deviating Region 1 also comprises an apparently new ACME-III element. The presence of  
354 *opp* genes and *ccrA/B-1* recombinase genes are reminiscent of the CC34 strain 21342  
355 (GenBank AHKU) although the sequence of *ccrB-1* appears to be more related to the one  
356 from SCC*mec* IX. It also includes, as revealed mainly by Nanopore sequencing, a gene with  
357 repetitive sequences that is very similar to the gene encoding a hypothetical protein  
358 DLJ55\_14705 in strain MOK042. This strain belongs to ST71, a lineage that also can be  
359 described as chimera, comprising of a large insert of unknown origin in a CC97 genome. In  
360 strain MOK042, the gene encoding DLJ55\_14705 is localised on that insert but it is not a part  
361 of a SCC element.

362 In addition, there is a second Deviant Region elsewhere in the genome of the lineage of  
363 ANR570100. Its gene content as well as its gene sequences are highly similar to 02T-671 and  
364 to reference CC1 sequences but they clearly differ from canonical CC80. These differences  
365 include, but are not limited to, the absence of *edinB* and *etD*. Unfortunately, the region in  
366 question includes genes whose origin cannot be determined because of a high degree of  
367 conservation of the genes affected. For the same reason, the exact boundaries of the Deviating  
368 Region cannot be identified. Interestingly, the adjacent regions to Deviant Region 2 are very  
369 similar in all sequences analysed, *i.e.*, ANR570100, 02T-671 as well as the reference CC1 and  
370 CC80 sequences (with differences being less than 0.5%). This could suggest that the region  
371 corresponding to Deviant Region 2 was “deviant” not in ANR570100 but, compared to the  
372 other three sequences, in the CC80 reference sequence. This might indicate that Deviant

373 Region 2 in ANR570100 was not an alien insert of CC1 origin but that its sequence represents  
374 shared, ancestral CC1/CC80 stock and that the corresponding region in canonical CC80  
375 (including *edinB* and *etD*) itself was an insert from another, yet unidentified, lineage.

376 In conclusion, the core genome of ANR570100 bears evidence of at least two, possibly three  
377 large-scale recombination events. First, ORF-CM14, among other genes, was introduced into  
378 a CC1 strain and, second, the resulting ORF-CM14/CC1 composite fragment was introduced  
379 into CC80. In addition, another recombination event introduced either Deviating Region 2  
380 from CC1 into the ancestor of ANR570100 or the corresponding region, possibly together  
381 with *edinB* and *etD*, from an unknown donor into canonical CC80.

382 Thus, such complex and large-scale recombination events cannot be that rare and exceptional,  
383 despite a mainly clonal nature of *S. aureus* [45]. Although the exact mechanism is not clear,  
384 chimerism seems to be an additional pathway in the evolution of *S. aureus*, possibly being  
385 responsible for a transmission of virulence factors (such as ORF-CM14 in the case described  
386 herein) or of resistance genes including entire *SCCmec* elements [3]. From a more theoretical  
387 point of view, large-scale genomic substitutions, chimerism or hybridisation facilitate  
388 evolutionary leaps that cannot be achieved by accumulation of single point mutations or that  
389 would require immeasurably much more time to be achieved by mutations. If one considers  
390 the ability to evolve and adapt as an evolutionary advantage, an organism that can shuffle,  
391 swap or exchange major parts of its genome by whatever unknown mechanism should be in a  
392 better position than a strictly clonal organism.

393

## 394 **Acknowledgements**

395 A part of this work was presented during a poster presentation at the 18<sup>th</sup> International  
396 Symposium on Staphylococci and Staphylococcal Infections (ISSSI, 23 – 26 August, 2018  
397 Copenhagen, Denmark).

398 We thank for the excellent technical assistance of Byrgit Hofmann, Friedrich-Loeffler-  
399 Institut, Jena, Germany, as well as Peter Slickers, Jena, for help and advice regarding  
400 sequence analyses.

## 401 **Authors' contributions**

402 A. Ruppelt-Lorz and B. Söderquist found and identified strains of interest. P. Slickers, R.  
403 Ehricht and S. Monecke designed the study. A. Ruppelt-Lorz, E. Müller, D. Gawlik and A.  
404 Reißig carried out experiments; S. Monecke analysed the sequence data; H. Hotzel, S. Braun  
405 and B. Söderquist performed/supervised sequencing; A. Ziegler-Cordts created a software  
406 tool used for sequence analysis; D. Gawlik, R. Ehricht and S. Monecke wrote the manuscript.  
407 All authors read and approved the final manuscript.

408 **Funding**

409 There was no external funding for this study.

410 **Competing interests**

411 DG is employee of PTC - Phage Technology Center GmbH, Bönen, Germany; AZC is  
412 employee of T-Systems Multimedia Solutions GmbH, Dresden, Germany. In both cases, work  
413 on this project was performed before the respective employments started. Thus, employers of  
414 the authors did not have any role in the study design, data collection and analysis, decision to  
415 publish, or preparation of the manuscript. The other authors declare that no competing  
416 interests exist.

417 The authors adhere to PLOS ONE policies on sharing data and materials. The specific roles of  
418 authors are articulated in the ‘author contributions’ section.

419 **Availability of data and materials**

420 The genome sequences of ANR570100 and 02T-671 are published in GenBank under the  
421 following accession numbers: *submission pending*

422 **Ethics approval and consent to participate**

423 Not applicable.

## References

1. Wan TW, Khokhlova OE, Iwao Y, Higuchi W, Hung WC, Reva IV, et al. Complete Circular Genome Sequence of Successful ST8/SCC*mec*IV Community-Associated Methicillin-Resistant *Staphylococcus aureus* (OC8) in Russia: One-Megabase Genomic Inversion, IS256's Spread, and Evolution of Russia ST8-IV. PLoS ONE. 2016;11(10):e0164168. Epub 2016/10/16. doi: 10.1371/journal.pone.0164168. PubMed PMID: 27741255; PubMed Central PMCID: PMC5065196.
2. Robinson DA, Enright MC. Evolution of *Staphylococcus aureus* by Large Chromosomal Replacements. J Bacteriol. 2004;186(4):1060-4.
3. Nimmo GR, Steen JA, Monecke S, Ehricht R, Slickers P, Thomas JC, et al. ST2249-MRSA-III: a second major recombinant methicillin-resistant *Staphylococcus aureus* clone causing healthcare infection in the 1970s. Clin Microbiol Infect. 2015;21(5):444-50. Epub 2015/02/25. doi: 10.1016/j.cmi.2014.12.018. PubMed PMID: 25708549; PubMed Central PMCID: PMC4564996.
4. Fetsch A, Kraushaar B, Kasbohrer A, Hammerl JA. Turkey Meat as Source of CC9/CC398 Methicillin-Resistant *Staphylococcus aureus* in Humans? Clin Infect Dis. 2017;64(1):102-3. Epub 2016/10/30. doi: 10.1093/cid/ciw687. PubMed PMID: 27794020; PubMed Central PMCID: PMC5159606.
5. Monecke S, Slickers P, Gawlik D, Müller E, Reissig A, Ruppelt-Lorz A, et al. Variability of SCC*mec* elements in livestock-associated CC398 MRSA. Veterinary Microbiology. 2018;217:36-46. doi: 10.1016/j.vetmic.2018.02.024.
6. Faria NA, Oliveira DC, Westh H, Monnet DL, Larsen AR, Skov R, et al. Epidemiology of emerging methicillin-resistant *Staphylococcus aureus* (MRSA) in Denmark: a nationwide study in a country with low prevalence of MRSA infection. J Clin Microbiol. 2005;43(4):1836-42. PubMed PMID: 15815005.
7. Holmes A, Ganner M, McGuane S, Pitt TL, Cookson BD, Kearns AM. *Staphylococcus aureus* isolates carrying Pantone-Valentine leukocidin genes in England and Wales: frequency, characterization, and association with clinical disease. J Clin Microbiol. 2005;43(5):2384-90. PubMed PMID: 15872271.
8. Krziwanek K, Luger C, Sammer B, Stumvoll S, Stammmler M, Metz-Gercek S, et al. PVL-positive MRSA in Austria. Eur J Clin Microbiol Infect Dis. 2007;26(12):931-5. PubMed PMID: 17891548.
9. Monecke S, Aamot HV, Stieber B, Ruppelt A, Ehricht R. Characterization of PVL-positive MRSA from Norway. Apmis. 2014;122(7):580-4. Epub 2013/10/11. doi: 10.1111/apm.12181. PubMed PMID: 24106794.
10. Monecke S, Slickers P, Hotzel H, Richter-Huhn G, Pohle M, Weber S, et al. Microarray-based characterisation of a Pantone-Valentine leukocidin-positive community-acquired strain of methicillin-resistant *Staphylococcus aureus*. Clin Microbiol Infect. 2006;12(8):718-28.
11. Monecke S, Jatzwauk L, Weber S, Slickers P, Ehricht R. DNA microarray-based genotyping of methicillin-resistant *Staphylococcus aureus* strains from Eastern Saxony. Clin Microbiol Infect. 2008;14(6):534-45. Epub 2008/04/01. doi: 10.1111/j.1469-0691.2008.01986.x. PubMed PMID: 18373691.
12. Otter JA, French GL. The emergence of community-associated methicillin-resistant *Staphylococcus aureus* at a London teaching hospital, 2000-2006. Clin Microbiol Infect. 2008;14(7):670-6. PubMed PMID: 18558939.
13. Rossney AS, Shore AC, Morgan PM, Fitzgibbon MM, O'Connell B, Coleman DC. The emergence and importation of diverse genotypes of methicillin-resistant *Staphylococcus aureus* (MRSA) harboring the Pantone-Valentine leukocidin gene (*pvl*) reveal that *pvl* is a poor marker for community-acquired MRSA strains in Ireland. J Clin Microbiol. 2007;45(8):2554-63. PubMed PMID: 17581935.
14. Stegger M, Wirth T, Andersen PS, Skov RL, De Grassi A, Simoes PM, et al. Origin and evolution of European community-acquired methicillin-resistant *Staphylococcus aureus*. mBio. 2014;5(5):e01044-14. Epub 2014/08/28. doi: 10.1128/mBio.01044-14. PubMed PMID: 25161186; PubMed Central PMCID: PMC4173770.
15. Aires de Sousa M, Bartzavali C, Spiliopoulou I, Sanches IS, Crisostomo MI, de Lencastre H. Two international methicillin-resistant *Staphylococcus aureus* clones endemic in a university hospital in Patras, Greece. J Clin Microbiol. 2003;41(5):2027-32. PubMed PMID: 12734244.
16. Vourli S, Perimeni D, Makri A, Polemis M, Voyiatzi A, Vatopoulos A. Community acquired MRSA infections in a paediatric population in Greece. Euro Surveill. 2005;10(5):78-9. PubMed PMID: 16077207.
17. Maier J, Melzl H, Reischl U, Drubel I, Witte W, Lehn N, et al. Pantone-Valentine leukocidin-positive methicillin-resistant *Staphylococcus aureus* in Germany associated with travel or foreign family origin. Eur J Clin Microbiol Infect Dis. 2005;24(9):637-9.
18. Tokajian ST, Khalil PA, Jabbour D, Rizk M, Farah MJ, Hashwa FA, et al. Molecular characterization of *Staphylococcus aureus* in Lebanon. Epidemiol Infect. 2010;138(5):707-12. PubMed PMID: 20202283.
19. Scicluna E, Shore A, Thuermer A, Ehricht R, Slickers P, Borg M, et al. Characterisation of MRSA from Malta and the description of a Maltese epidemic MRSA strain. Eur J Clin Microbiol Infect Dis. 2010;29(2):163-70.
20. Ben Nejma M, Mastouri M, Bel Hadj Jrad B, Nour M. Characterization of ST80 Pantone-Valentine leukocidin-positive community-acquired methicillin-resistant *Staphylococcus aureus* clone in Tunisia. Diagn Microbiol Infect Dis. 2013;77(1):20-4. Epub 2008/04/09. doi: 10.1016/j.diagmicrobio.2008.02.010. PubMed PMID: 18394845.
21. Ben Slama K, Gharsa H, Klibi N, Jouini A, Lozano C, Gomez-Sanz E, et al. Nasal carriage of *Staphylococcus aureus* in healthy humans with different levels of contact with animals in Tunisia: genetic lineages, methicillin resistance, and virulence factors. Eur J Clin Microbiol Infect Dis. 2011;30(4):499-508. Epub 2010/11/16. doi: 10.1007/s10096-010-1109-6. PubMed PMID: 21076928.
22. Antri K, Rouzic N, Dauwalder O, Boubekri I, Bes M, Lina G, et al. High prevalence of methicillin-resistant *Staphylococcus aureus* clone ST80-IV in hospital and community settings in Algiers. Clin Microbiol Infect. 2011;17(4):526-32.
23. Basset P, Amhis W, Blanc DS. Changing molecular epidemiology of methicillin-resistant *Staphylococcus aureus* in an Algerian hospital. J Infect Dev Ctries. 2015;9(2):206-9. Epub 2015/02/24. doi: 10.3855/jidc.4620. PubMed PMID: 25699496.

24. Djoudi F, Bonura C, Benallaoua S, Touati A, Touati D, Aleo A, et al. Panton-Valentine leukocidin positive sequence type 80 methicillin-resistant *Staphylococcus aureus* carrying a staphylococcal cassette chromosome *mec* type IVc is dominant in neonates and children in an Algiers hospital. *New Microbiol.* 2013;36(1):49-55. Epub 2013/02/26. PubMed PMID: 23435815.
25. Boswihi SS, Udo EE, Al-Sweih N. Shifts in the Clonal Distribution of Methicillin-Resistant *Staphylococcus aureus* in Kuwait Hospitals: 1992-2010. *PLoS ONE.* 2016;11(9):e0162744. doi: 10.1371/journal.pone.0162744.
26. Monecke S, Skakni L, Hasan R, Ruppelt A, Ghazal SS, Hakawi A, et al. Characterisation of MRSA strains isolated from patients in a hospital in Riyadh, Kingdom of Saudi Arabia. *BMC Microbiol.* 2012;12(1):146. Epub 2012/07/25. doi: 10.1186/1471-2180-12-146. PubMed PMID: 22823982.
27. Udo EE, Al-Lawati BAH, Al-Muharmi Z, Thukral SS. Genotyping of methicillin-resistant *Staphylococcus aureus* in the Sultan Qaboos University Hospital, Oman reveals the dominance of Panton-Valentine leukocidin-negative ST6-IV/t304 clone. *New Microbes and New Infections.* 2014;2(4):100-5. doi: 10.1002/nmi.2.47. PubMed PMID: PMC4184578.
28. Udo EE, Sarkhoo E. Genetic analysis of high-level mupirocin resistance in the ST80 clone of community-associated methicillin-resistant *Staphylococcus aureus*. *J Med Microbiol.* 2010;59(Pt 2):193-9. PubMed PMID: 19833783.
29. Shittu AO, Oyedara O, Kenneth OO, Raji A, Peters G, von Müller L, et al. An assessment on DNA microarray and sequence-based methods for the characterization of methicillin-susceptible *Staphylococcus aureus* from Nigeria. *Frontiers in Microbiology.* 2015;6. doi: 10.3389/fmicb.2015.01160.
30. Ghebremedhin B, Olugbosi MO, Raji AM, Layer F, Bakare RA, Konig B, et al. Emergence of a community-associated methicillin-resistant *Staphylococcus aureus* strain with a unique resistance profile in Southwest Nigeria. *J Clin Microbiol.* 2009;47(9):2975-80. PubMed PMID: 19571020.
31. Schaumburg F, Kock R, Friedrich AW, Soulanoudjingar S, Ngoa UA, von Eiff C, et al. Population structure of *Staphylococcus aureus* from remote African Babongo Pygmies. *PLoS Negl Trop Dis.* 2011;5(5):e1150. Epub 2011/05/17. doi: 10.1371/journal.pntd.0001150. PubMed PMID: 21572985; PubMed Central PMCID: PMC3091839.
32. Monecke S, Coombs G, Shore AC, Coleman DC, Akpaka P, Borg M, et al. A field guide to pandemic, epidemic and sporadic clones of methicillin-resistant *Staphylococcus aureus*. *PLoS One.* 2011;6(4):e17936. doi: 10.1371/journal.pone.0017936.
33. Monecke S, Jatzwauk L, Muller E, Nitschke H, Pfohl K, Slickers P, et al. Diversity of SCC*mec* elements in *Staphylococcus aureus* as observed in South-Eastern Germany. *PLoS ONE.* 2016;11(9):e0162654. Epub 2016/09/21. doi: 10.1371/journal.pone.0162654. PubMed PMID: 27648947.
34. Monecke S, Slickers P, Ehricht R. Assignment of *Staphylococcus aureus* isolates to clonal complexes based on microarray analysis and pattern recognition. *FEMS Immunol Med Microbiol.* 2008;53:237-51.
35. Herrmann M, Abdullah S, Alabi A, Alonso P, Friedrich AW, Fuhr G, et al. Staphylococcal disease in Africa: another neglected 'tropical' disease. *Future Microbiol.* 2013;8(1):17-26. Epub 2012/12/21. doi: 10.2217/fmb.12.126. PubMed PMID: 23252490.
36. Strauß L, Ruffing U, Abdulla S, Alabi A, Akulenko R, Garrine M, et al. Detecting *Staphylococcus aureus* Virulence and Resistance Genes: a Comparison of Whole-Genome Sequencing and DNA Microarray Technology. *Journal of Clinical Microbiology.* 2016;54(4):1008-16. doi: 10.1128/jcm.03022-15.
37. Dunne WM, Pouseele H, Monecke S, Ehricht R, van Belkum A. Epidemiology of transmissible diseases: Array hybridization and next generation sequencing as universal nucleic acid-mediated typing tools. *Infection Genetics and Evolution.* 2018;63:332-45. doi: 10.1016/j.meegid.2017.09.019. PubMed PMID: WOS:000442167600043.
38. Conceicao T, Coelho C, Silva IS, de Lencastre H, Aires-de-Sousa M. *Staphylococcus aureus* in former Portuguese colonies from Africa and the Far East: missing data to help fill the world map. *Clin Microbiol Infect.* 2015;21(9):842 e1- e10. Epub 2015/05/25. doi: 10.1016/j.cmi.2015.05.010. PubMed PMID: 26003281.
39. Conceicao T, Santos Silva I, de Lencastre H, Aires-de-Sousa M. *Staphylococcus aureus* nasal carriage among patients and health care workers in Sao Tome and Principe. *Microb Drug Resist.* 2014;20(1):57-66. Epub 2013/09/13. doi: 10.1089/mdr.2013.0136. PubMed PMID: 24024594.
40. Egyir B, Guardabassi L, Sorum M, Nielsen SS, Kolekang A, Frimpong E, et al. Molecular epidemiology and antimicrobial susceptibility of clinical *Staphylococcus aureus* from healthcare institutions in Ghana. *PLoS ONE.* 2014;9(2):e89716. Epub 2014/03/04. doi: 10.1371/journal.pone.0089716. PubMed PMID: 24586981; PubMed Central PMCID: PMC3934920.
41. Ruimy R, Maiga A, Armand-Lefevre L, Maiga I, Diallo A, Koumare AK, et al. The carriage population of *Staphylococcus aureus* from Mali is composed of a combination of pandemic clones and the divergent Panton-Valentine leukocidin-positive genotype ST152. *J Bacteriol.* 2008;190(11):3962-8. PubMed PMID: 18375551.
42. Shittu A, Oyedara O, Abegunrin F, Okon K, Raji A, Taiwo S, et al. Characterization of methicillin-susceptible and -resistant staphylococci in the clinical setting: a multicentre study in Nigeria. *BMC Infect Dis.* 2012;12:286. Epub 2012/11/06. doi: 10.1186/1471-2334-12-286. PubMed PMID: 23121720; PubMed Central PMCID: PMC3529121.
43. Shittu AO, Okon K, Adesida S, Oyedara O, Witte W, Strommenger B, et al. Antibiotic resistance and molecular epidemiology of *Staphylococcus aureus* in Nigeria. *BMC Microbiol.* 2011;11:92. PubMed PMID: 21545717.
44. Okuda KV, Toepfner N, Alabi AS, Arnold B, Belard S, Falke U, et al. Molecular epidemiology of *Staphylococcus aureus* from Lambarene, Gabon. *Eur J Clin Microbiol Infect Dis.* 2016. doi: 10.1007/s10096-016-2748-z. PubMed PMID: 27553495.
45. Feil EJ, Cooper JE, Grundmann H, Robinson DA, Enright MC, Berendt T, et al. How clonal is *Staphylococcus aureus*? *J Bacteriol.* 2003;185(11):3307-16. PubMed PMID: 12754228.

## **Tables, Figures and Supplemental Files**

**Table 1:** Genes in Deviating Region 1 in comparison to canonical CC80, to 02T-671 and to canonical CC1.

**Table 2:** The ACME-III element in ANR570100 and 02T-671.

**Table 3:** Genes in Deviating Region 2 in comparison to canonical CC80, to 02T-671 and to canonical CC1.

**Figure 1:** Schematic diagram of the genomes of 02T567 (outer circle), ANR570100 (middle circle) and the reference genome CC80, 11819-97, GenBank CP003194.1 (inner circle). Genomic fragments are colour-coded depending on their origin.

**Supplemental file 1:** Array hybridization patterns of strains discussed.

**Supplemental file 2A:** Illumina and Nanopore Consensus sequence of ANR570100.

**Supplemental file 2B:** Annotated sequence of ANR570100.

**Supplemental file 3A:** Illumina sequence of 02T671.

**Supplemental file 3B:** Annotated sequence of 02T671.

**Supplemental file 4:** fasta-file with the ACME III sequences and markers.



**Table 1:** Genes in Deviating Region 1 in comparison to canonical CC80, to 02T-671 and to canonical CC1.

|                                 | Comparison of ANR570100 to CC80 reference sequence 11819-97 (CP003194) | Comparison of ANR570100 to 02T-671       | Comparison of 02T-671 to MW2                             | Provenance in ANR570100                    | Provenance in 02T-671                      |
|---------------------------------|------------------------------------------------------------------------|------------------------------------------|----------------------------------------------------------|--------------------------------------------|--------------------------------------------|
| <i>walR</i>                     | 0 mismatches/702 bases (0%)                                            | 2 mismatches/702 bases (0.28%)           | 4 mismatches/702 bases (0.57%)                           | CC80                                       | unknown                                    |
| <i>walK</i>                     | 5 mismatches/1827 bases (0.27%)                                        | 12 mismatches/1827 bases (0.66%)         | 14 mismatches/1827 bases (0.77%)                         | CC80                                       | unknown                                    |
| <i>walH</i>                     | 18 mismatches/1335 bases (1.35%)                                       | 36 mismatches/1335 bases (2.7%)          | 36 mismatches/1335 bases (2.7%)                          | CC80                                       | unknown                                    |
| <i>walI</i>                     | 0 mismatches/789 bases (0%)                                            | 19 mismatches/789 bases (2.41%)          | 19 mismatches/789 bases (2.41%)                          | CC80                                       | unknown                                    |
| <i>walJ</i>                     | 17 mismatches/801 bases (2.12%)                                        | 0 mismatches/801 bases (0%)              | 18 mismatches/801 bases (2.25%)                          | unknown                                    | unknown                                    |
| <i>sasH</i>                     | 95 mismatches/2319 bases (4.1%)                                        | 0 mismatches/2319 bases (0%)             | 65 mismatches/2319 bases (2.8%)                          | unknown                                    | unknown                                    |
| <i>orfX</i>                     | 16 mismatches/480 bases (3.33%)                                        | 0 mismatches/480 bases (0%)              | 14 mismatches/480 bases (2.92%)                          | unknown                                    | unknown                                    |
| <b>ACME-III (see Table 2)</b>   | <i>Not present in 11819-97 (which has SCCmec IVc instead)</i>          | Identical element (see text and Table 3) | <i>Not present in MW2 (which has SCCmec IVa instead)</i> | ACME-III                                   | ACME-III                                   |
| <b>Q6GKL1</b>                   | <i>Not present in 11819-97/in canonical CC80</i>                       | 0 mismatches/576 bases (0%)              | <i>Not present in MW2/in canonical CC1</i>               | unknown                                    | unknown                                    |
| <b>Q6GKL6</b>                   | <i>Not present in 11819-97/in canonical CC80</i>                       | 0 mismatches/159 bases (0%)              | <i>Not present in MW2/in canonical CC1</i>               | unknown                                    | unknown                                    |
| <b>ORF-CM14</b>                 | <i>Not present in 11819-97/in canonical CC80</i>                       | 0 mismatches/780 bases (0%)              | <i>Not present in MW2/in canonical CC1</i>               | unknown                                    | unknown                                    |
| <i>dusC</i>                     | 29 mismatches/987 bases (2.94%)                                        | 0 mismatches/987 bases (0%)              | 26 mismatches/987 bases (2.63%)                          | unknown                                    | unknown                                    |
| <b>A6TXM6</b>                   | 23 mismatches/204 bases (11.27%)                                       | 0 mismatches/204 bases (0%)              | 25 mismatches/204 bases (12.25%)                         | unknown                                    | unknown                                    |
| <b>A6QD71</b>                   | 31 mismatches/297 bases (10.44%)                                       | 0 mismatches/297 bases (0%)              | 32 mismatches/297 bases (10.77%)                         | unknown                                    | unknown                                    |
| <b>Q5HJT2</b>                   | <i>Absent from ANR570100 and canonical CC80</i>                        | <i>Absent from ANR570100 and 02T-671</i> | <i>Absent from 02T-671 but present in canonical CC1</i>  | unknown                                    | unknown                                    |
| <b>Q6GD34</b>                   | <i>Absent from ANR570100 and canonical CC80</i>                        | <i>Absent from ANR570100 and 02T-671</i> | <i>Absent from 02T-671 but present in canonical CC1</i>  | unknown                                    | unknown                                    |
| <b>A6QD75</b>                   | <i>Absent from ANR570100 and canonical CC80</i>                        | <i>Absent from ANR570100 and 02T-671</i> | <i>Absent from 02T-671 but present in canonical CC1</i>  | unknown                                    | unknown                                    |
| <b>A6QD76</b>                   | <i>Absent from ANR570100 and canonical CC80</i>                        | <i>Absent from ANR570100 and 02T-671</i> | <i>Absent from 02T-671 but present in canonical CC1</i>  | unknown                                    | unknown                                    |
| <b>A8YZ18</b>                   | <i>Absent from ANR570100 and canonical CC80</i>                        | <i>Absent from ANR570100 and 02T-671</i> | <i>Absent from 02T-671 but present in canonical CC1</i>  | unknown                                    | unknown                                    |
| <b>Q6GKK6</b>                   | 22 mismatches/612 bases (3.6%)                                         | 1 mismatches/612 bases (0.16%)           | 17 mismatches/612 bases (2.78%)                          | unknown                                    | unknown                                    |
| <b>Q7A890</b>                   | <i>Not present in 11819-97</i>                                         | 1 mismatches/3153 bases (0.03%)          | 104 mismatches/3153 bases (3.3%)                         | unknown                                    | unknown                                    |
| <b>Q2YUT2</b>                   | 1 mismatches/483 bases (0.21%)                                         | 0 mismatches/483 bases (0%)              | 2 mismatches/483 bases (0.41%)                           | CC1 or CC80                                | CC1                                        |
| <i>plc</i>                      | 26 mismatches/987 bases (2.63%)                                        | 0 mismatches/987 bases (0%)              | 1 mismatches/987 bases (0.1%)                            | CC1                                        | CC1                                        |
| <b><i>lpl</i>-SAOUHSC 00052</b> | 17 mismatches/771 bases (2.2%)                                         | 0 mismatches/771 bases (0%)              | 1 mismatches/771 bases (0.13%)                           | CC1                                        | CC1                                        |
| <b><i>lpl</i>-SAOUHSC 00053</b> | 97 mismatches/771 bases (12.58%)                                       | 0 mismatches/771 bases (0%)              | 1 mismatches/771 bases (0.13%)                           | CC1                                        | CC1                                        |
| <b><i>lpl</i>-MW0073</b>        | 100 mismatches/693 bases (14.43%)                                      | 0 mismatches/693 bases (0%)              | 0 mismatches/693 bases (0%)                              | CC1                                        | CC1                                        |
| <b><i>lipC3</i>-MW0074</b>      | 42 mismatches/1377 bases (3.05%)                                       | 0 mismatches/1377 bases (0%)             | 0 mismatches/1377 bases (0%)                             | CC1                                        | CC1                                        |
| <b>Q8NYT6</b>                   | 17 mismatches/2238 bases (0.76%)                                       | 1 mismatches/2238 bases (0.04%)          | 20 mismatches/2238 bases (0.89%)                         | CC1                                        | CC1 ?                                      |
| <b>Teg15as</b>                  | 0 mismatches/244 bases (0%)                                            | 0 mismatches/244 bases (0%)              | 0 mismatches/244 bases (0%)                              | <i>Related in all lineages in question</i> | <i>Related in all lineages in question</i> |

|                      | Comparison of ANR570100 to CC80 reference sequence 11819-97 (CP003194)                                            | Comparison of ANR570100 to 02T-671                                                                                     | Comparison of 02T-671 to MW2                                                                                            | Provenance in ANR570100                    | Provenance in 02T-671                      |
|----------------------|-------------------------------------------------------------------------------------------------------------------|------------------------------------------------------------------------------------------------------------------------|-------------------------------------------------------------------------------------------------------------------------|--------------------------------------------|--------------------------------------------|
| <b>Q8NYT5</b>        | 23 mismatches/1179 bases (1.95%)                                                                                  | 0 mismatches/1179 bases (0%)                                                                                           | 1 mismatches/1179 bases (0.08%)                                                                                         | CC1                                        | CC1                                        |
| <i>norC</i>          | 27 mismatches/1389 bases (1.94%)                                                                                  | 0 mismatches/1389 bases (0%)                                                                                           | 0 mismatches/1389 bases (0%)                                                                                            | CC1                                        | CC1                                        |
| <i>nptA</i>          | 14 mismatches/1662 bases (0.84%)                                                                                  | 0 mismatches/1662 bases (0%)                                                                                           | 0 mismatches/1389 bases (0%)                                                                                            | CC1                                        | CC1                                        |
| <b>Q2YUS5</b>        | 17 mismatches/1776 bases (0.96%)                                                                                  | 0 mismatches/1776 bases (0%)                                                                                           | 1 mismatches/1776 bases (0.06%)                                                                                         | CC1                                        | CC1                                        |
| <b>DUF1648</b>       | 0 mismatches/474 bases (0%)                                                                                       | 0 mismatches/474 bases (0%)                                                                                            | 0 mismatches/474 bases (0%)                                                                                             | <i>Related in all lineages in question</i> | <i>Related in all lineages in question</i> |
| <i>lctP-locus1</i>   | 20 mismatches/1593 bases (1.26%)                                                                                  | 0 mismatches/1593 bases (0%)                                                                                           | 0 mismatches/1593 bases (0%)                                                                                            | CC1                                        | CC1                                        |
| <i>txbi_lctP</i>     | 1 mismatches/72 bases (1.39%)                                                                                     | 0 mismatches/72 bases (0%)                                                                                             | 0 mismatches/72 bases (0%)                                                                                              | CC1                                        | CC1                                        |
| <i>txbi_proteinA</i> | 1 mismatches/62 bases (1.61%)                                                                                     | 0 mismatches/62 bases (0%)                                                                                             | 0 mismatches/62 bases (0%)                                                                                              | CC1                                        | CC1                                        |
| <i>spa</i>           | ANR570100: <i>spa</i> t 1849<br><b>07-23-34-33-13</b><br>11819-97: <i>spa</i> t044<br><b>07-23-12-34-34-33-34</b> | ANR570100: <i>spa</i> t 1849<br><b>07-23-34-33-13</b><br>02T671: <i>spa</i> t1242<br><b>07-23-12-34-34-16-34-33-13</b> | 02T671: <i>spa</i> t1242<br><b>07-23-12-34-34-16-34-33-13</b><br>MW2: <i>spa</i> t128<br><b>07-23-23-21-16-34-33-13</b> | <i>Related in all lineages in question</i> | <i>Related in all lineages in question</i> |
| <i>tx_sarS</i>       | 0 mismatches/63 bases (0%)                                                                                        | 0 mismatches/63 bases (0%)                                                                                             | 0 mismatches/63 bases (0%)                                                                                              | <i>Related in all lineages in question</i> | <i>Related in all lineages in question</i> |
| <i>sarS</i>          | 5 mismatches/753 bases (0.66%)                                                                                    | 0 mismatches/753 bases (0%)                                                                                            | 0 mismatches/753 bases (0%)                                                                                             | CC1                                        | CC1                                        |
| <i>sirC</i>          | 7 mismatches/999 bases (0.7%)                                                                                     | 0 mismatches/999 bases (0%)                                                                                            | 0 mismatches/999 bases (0%)                                                                                             | CC1                                        | CC1                                        |
| <i>sirB</i>          | 4 mismatches/996 bases (0.4%)                                                                                     | 5 mismatches/996 bases (0.5%)                                                                                          | 0 mismatches/996 bases (0%)                                                                                             | CC1 or CC80                                | CC1                                        |
| <i>sirA</i>          | 0 mismatches/993 bases (0%)                                                                                       | 6 mismatches/993 bases (0.6%)                                                                                          | 9 mismatches/993 bases (0.91%)                                                                                          | CC80                                       | CC1 ?                                      |
| <i>sbnA</i>          | 0 mismatches/981 bases (0%)                                                                                       | 1 mismatches/981 bases (0.1%)                                                                                          | 0 mismatches/981 bases (0%)                                                                                             | <i>Related in all lineages in question</i> | <i>Related in all lineages in question</i> |
| <i>sbnB</i>          | 1 mismatches/1011 bases (0.1%)                                                                                    | 2 mismatches/1011 bases (0.2%)                                                                                         | 1 mismatches/1011 bases (0.1%)                                                                                          | CC1 or CC80                                | CC1                                        |
| <i>sbnC</i>          | 4 mismatches/1755 bases (0.23%)                                                                                   | 9 mismatches/1755 bases (0.51%)                                                                                        | 0 mismatches/1755 bases (0%)                                                                                            | CC80                                       | CC1                                        |
| <i>sbnD</i>          | 3 mismatches/1257 bases (0.24%)                                                                                   | 0 mismatches/1257 bases (0%)                                                                                           | 3 mismatches/1257 bases (0.24%)                                                                                         | CC1 or CC80                                | CC1                                        |
| <i>sbnE</i>          | 16 mismatches/1737 bases (0.92%)                                                                                  | 17 mismatches/1737 bases (0.98%)                                                                                       | 8 mismatches/1737 bases (0.46%)                                                                                         | CC1 or CC80                                | CC1                                        |
| <i>sbnF</i>          | 0 mismatches/1740 bases (0%)                                                                                      | 8 mismatches/1740 bases (0.46%)                                                                                        | 13 mismatches/1740 bases (0.75%)                                                                                        | CC80                                       | CC1 ?                                      |
| <i>sbnG</i>          | 4 mismatches/777 bases (0.51%)                                                                                    | 4 mismatches/777 bases (0.51%)                                                                                         | 1 mismatches/777 bases (0.13%)                                                                                          | CC1 or CC80                                | CC1                                        |
| <i>sbnH</i>          | 5 mismatches/1203 bases (0.42%)                                                                                   | 3 mismatches/1203 bases (0.25%)                                                                                        | 2 mismatches/1203 bases (0.17%)                                                                                         | CC1 or CC80                                | CC1                                        |
| <i>sbnI</i>          | 3 mismatches/765 bases (0.39%)                                                                                    | 4 mismatches/765 bases (0.52%)                                                                                         | 2 mismatches/765 bases (0.26%)                                                                                          | CC80                                       | CC1                                        |
| <b>Q5HJP4</b>        | <i>Absent from ANR570100 and 11819-97</i>                                                                         | <i>Absent from ANR570100 but present in 02T-671</i>                                                                    | 1 mismatches/408 bases (0.25%)                                                                                          | CC80                                       | CC1                                        |

**Table 2:** The ACME-III element in ANR570100 and 02T-671.

| Gene                 | Description/gene product and comments                                                                                                                                                     | Orientation | Start position in SCC | End position in SCC | Start position in genome | End position in genome | Comparison of ANR570100 to 02T-671                                                   |
|----------------------|-------------------------------------------------------------------------------------------------------------------------------------------------------------------------------------------|-------------|-----------------------|---------------------|--------------------------|------------------------|--------------------------------------------------------------------------------------|
| <i>orfX</i>          | 23S rRNA methyltransferase with the SCC integration site being located at the 3' end of <i>orfX</i> .                                                                                     | Forward     | 1                     | 480                 | 33682                    | 34162                  | 0 mismatches/480 bases (0%)                                                          |
| <b>sRNA6</b>         | Antisense RNA associated with <i>orfX</i> .                                                                                                                                               |             | 181                   | 464                 | 33862                    | 34146                  | 0 mismatches/284 bases (0%)                                                          |
| <b>DR_SCC</b>        | Direct repeat of SCC, 19 nt of the 3' end of the coding sequence of <i>orfX</i> .                                                                                                         |             | 462                   | 480                 | 34143                    | 34162                  | 0 mismatches/19 bases (0%)                                                           |
| <i>dam5</i>          | Type II restriction-modification system, endonuclease and methyltransferase. A reference sequence for this gene is from strain K12S0375, GenBank JYGF01000026.1 [127750:130506].          | Forward     | 775                   | 3522                | 34456                    | 37204                  | 0 mismatches/2748 bases (0%)                                                         |
| <b>helicase</b>      | DNA helicase, associated with <i>dam</i> , putative restriction system. A reference sequence for this gene is from strain K12S0375, GenBank JYGF01000026.1 [130502:132466].               | Forward     | 3512                  | 5477                | 37193                    | 39159                  | 0 mismatches/1966 bases (0%)                                                         |
| <b>"YeeC"</b>        | YeeC-like protein. 1381/1442(96%) identities and 4/1442 gaps compared to strain FORC_090, GenBank CP029198.1:39824-41262 (FORC090_0030)                                                   | Reverse     | 5480                  | 6920                | 39161                    | 40602                  | 0 mismatches/1441 bases (0%)                                                         |
| <b>A9UFT0</b>        | LPXTG protein homologue. A reference sequence for this gene is from strain C427-ST42, GenBank ACSQ01000048.1 [74:295].                                                                    | Reverse     | 6685                  | 6906                | 40366                    | 40588                  | 0 mismatches/222 bases (0%)                                                          |
| <b>Q9KX75</b>        | Putative protein, encoded on SCC elements. A reference sequence for this gene is from strain C427-ST42, GenBank ACSQ01000048.1 [310:813].                                                 | Reverse     | 6921                  | 7423                | 40602                    | 41105                  | 0 mismatches/503 bases (0%)                                                          |
| <b>Q7A207</b>        | Putative protein, encoded on SCC elements. A reference sequence for this gene is from strain C427-ST42, GenBank ACSQ01000048.1 [829:1143].                                                | Reverse     | 7439                  | 7750                | 41120                    | 41432                  | 0 mismatches/312 bases (0%)                                                          |
| <b>Q7A206</b>        | Putative protein, encoded on SCC elements. A reference sequence for this gene is from strain C427-ST42, GenBank ACSQ01000048.1 [1230:1580].                                               |             | 7752                  | 7838                | 41433                    | 41520                  | 0 mismatches/87 bases (0%)                                                           |
| <i>ccrB-1</i>        | Cassette chromosome recombinase B, type I. A reference sequence for this gene is from strain JCSC6690, GenBank AB705452.1 [7432:9057:r].                                                  | Reverse     | 8654                  | 10282               | 42335                    | 43964                  | 0 mismatches/1629 bases (0%)                                                         |
| <i>ccrA-1</i>        | Cassette chromosome recombinase A, type I. 1268/1352 (94%) identities and 4/1352 gaps compared to strain JCSC6690 SCCmec type IX, GenBank AB705452.1 [10431-10962].                       | Reverse     | 10303                 | 11652               | 43984                    | 45334                  | 0 mismatches/1350 bases (0%)                                                         |
| <b>ORF No KK12</b>   | 513/532 (96%) identities and 1/532 gaps compared to strain JCSC6690 SCCmec type IX, GenBank AB705452.1 [10431-10962].                                                                     |             | 11655                 | 12185               | 45336                    | 45867                  | 0 mismatches/531 bases (0%)                                                          |
| <i>cch</i>           | Cassette chromosome helicase.                                                                                                                                                             | Reverse     | 12188                 | 13974               | 45868                    | 47656                  | 0 mismatches/1788 bases (0%)                                                         |
| <b>orf7795</b>       | Putative protein from ACME element of strain C427. A reference sequence for this gene is from strain C427-ST42, GenBank ACSQ01000048.1 [7795:9354].                                       | Reverse     | 14398                 | 15957               | 48079                    | 49639                  | 0 mismatches/1560 bases (0%)                                                         |
| <b>IR_IS431</b>      | Inverted repeat of IS431.                                                                                                                                                                 |             | 16224                 | 16239               | 49905                    | 49921                  | 0 mismatches/16 bases (0%)                                                           |
| <b>tnpIS431-06</b>   | Transposase for IS431.                                                                                                                                                                    | Reverse     | 16284                 | 16958               | 49965                    | 50640                  | 0 mismatches/675 bases (0%)                                                          |
| <b>"DLJ55_14705"</b> | Hypothetical protein. 97% identity compared to, GenBank CP029627.1:2809799-2816653, strain MOK042; 98% identity compared to CP029650.1:1401-8447, a plasmid from strain AR_0471, GenBank. | Forward     | 17243                 | 24273               | 50924                    | 57955                  | Cannot be assessed because of discrepancies between Nanopore and Illumina sequences. |

| Gene                       | Description/gene product and comments                                                                                                                                        | Orientation | Start position in SCC | End position in SCC | Start position in genome | End position in genome | Comparison of ANR570100 to 02T-671 |
|----------------------------|------------------------------------------------------------------------------------------------------------------------------------------------------------------------------|-------------|-----------------------|---------------------|--------------------------|------------------------|------------------------------------|
| <b>IR_IS431</b>            | Inverted repeat of IS431.                                                                                                                                                    |             | 24603                 | 24618               | 58284                    | 58300                  | 0 mismatches/16 bases (0%)         |
| <b>F8WKF9</b>              | Putative membrane protein. A reference sequence for this gene is from strain C427-ST42, GenBank ACSQ01000050 [548:900].                                                      | Forward     | 24821                 | 25173               | 58502                    | 58855                  | 0 mismatches/353 bases (0%)        |
| <b>EHQ67276</b>            | Putative protein, branched-chain amino acid transport domain protein. A reference sequence for this gene is from strain C427-ST42, GenBank ACSQ01000050 [1158:1583].         | Forward     | 25431                 | 25856               | 59112                    | 59538                  | 0 mismatches/426 bases (0%)        |
| <b><i>opp3A/A8YZZ6</i></b> | Putative S-adenosyl-L-methionine-dependent methyltransferase from SCC elements. A reference sequence for this gene is from strain FPR3757, GenBank CP000255.1 [77130:77945]. | Forward     | 26265                 | 26903               | 59946                    | 60585                  | 0 mismatches/639 bases (0%)        |
| <b><i>opp3B</i></b>        | Nickel/peptide ABC superfamily ATP binding cassette transporter, membrane protein                                                                                            | Forward     | 28456                 | 29412               | 62137                    | 63094                  | 0 mismatches/957 bases (0%)        |
| <b><i>opp3C</i></b>        | Oligopeptide permease, channel-forming protein                                                                                                                               | Forward     | 29412                 | 30179               | 63093                    | 63861                  | 0 mismatches/768 bases (0%)        |
| <b><i>opp3D/A8YZ00</i></b> | Nickel/peptide ABC superfamily ATP binding cassette transporter, ABC protein, known from ACME elements.                                                                      | Forward     | 30146                 | 30913               | 63827                    | 64595                  | 0 mismatches/768 bases (0%)        |
| <b><i>opp3E/A8YZ01</i></b> | Nickel/peptide ABC superfamily ATP binding cassette transporter, ABC protein, known from ACME elements.                                                                      | Forward     | 30907                 | 31540               | 64587                    | 65222                  | 0 mismatches/635 bases (0%)        |
| <b>tnp_A8YYY6</b>          | Transposase.                                                                                                                                                                 |             | 31627                 | 32293               | 65308                    | 65975                  | 0 mismatches/667 bases (0%)        |
| <b>DR_SCC</b>              | Direct repeat of SCC.                                                                                                                                                        |             | 33683                 | 33701               | 67364                    | 67383                  | 0 mismatches/19 bases (0%)         |

**Table 3:** Genes in Deviating Region 2 in comparison to canonical CC80, to 02T-671 and to canonical CC1.

|                | <b>Comparison of ANR570100 to CC80 reference sequence 11819-97 (CP003194)</b> | <b>Comparison of ANR570100 to CC1 reference sequence MW2 (BA000033)</b> | <b>Comparison of ANR570100 to 02T-671</b> | <b>Provenance in ANR570100</b> |
|----------------|-------------------------------------------------------------------------------|-------------------------------------------------------------------------|-------------------------------------------|--------------------------------|
| <i>salA</i>    | 0 mismatches/1065 bases (0%)                                                  | 0 mismatches/1065 bases (0%)                                            | 0 mismatches/1065 bases (0%)              | CC1 or CC80                    |
| <i>ycnB</i>    | 1 mismatches/1443 bases (0.07%)                                               | 0 mismatches/1443 bases (0%)                                            | 0 mismatches/1443 bases (0%)              | CC1 or CC80                    |
| <i>sepA</i>    | 1 mismatches/468 bases (0.21%)                                                | 1 mismatches/468 bases (0.21%)                                          | 0 mismatches/468 bases (0%)               | CC1 or CC80                    |
| <i>sdrM</i>    | 4 mismatches/1344 bases (0.3%)                                                | 0 mismatches/1344 bases (0%)                                            | 0 mismatches/1344 bases (0%)              | CC1 or CC80                    |
| <i>hlIII</i>   | 3 mismatches/684 bases (0.44%)                                                | 3 mismatches/684 bases (0.44%)                                          | 0 mismatches/684 bases (0%)               | CC1 or CC80                    |
| <i>urtF</i>    | 3 mismatches/1188 bases (0.25%)                                               | 3 mismatches/1188 bases (0.25%)                                         | 0 mismatches/1188 bases (0%)              | CC1 or CC80                    |
| <i>yvsG</i>    | 0 mismatches/516 bases (0%)                                                   | 0 mismatches/516 bases (0%)                                             | 0 mismatches/516 bases (0%)               | CC1 or CC80                    |
| <i>ynzG</i>    | 0 mismatches/261 bases (0%)                                                   | 0 mismatches/261 bases (0%)                                             | 0 mismatches/261 bases (0%)               | CC1 or CC80                    |
| <b>Q5HE31</b>  | 3 mismatches/1371 bases (0.22%)                                               | 0 mismatches/1371 bases (0%)                                            | 0 mismatches/1371 bases (0%)              | CC1 or CC80                    |
| <i>htsC</i>    | 0 mismatches/969 bases (0%)                                                   | 0 mismatches/969 bases (0%)                                             | 0 mismatches/969 bases (0%)               | CC1 or CC80                    |
| <i>htsB</i>    | 10 mismatches/1032 bases (0.97%)                                              | 0 mismatches/1032 bases (0%)                                            | 0 mismatches/1032 bases (0%)              | CC1                            |
| <i>htsA</i>    | 0 mismatches/984 bases (0%)                                                   | 0 mismatches/984 bases (0%)                                             | 0 mismatches/984 bases (0%)               | CC1 or CC80                    |
| <b>tnpIS1</b>  | <i>Absent from CP003194</i>                                                   | 2 deletions in MW2/34 bases (5.88%)                                     | 0 mismatches/34 bases (0%)                | CC1                            |
| <b>Q5HE27</b>  | 4 mismatches/1071 bases (0.37%)                                               | 0 mismatches/1071 bases (0%)                                            | 0 mismatches/1071 bases (0%)              | CC1                            |
| <i>rhbC1</i>   | 18 mismatches/1758 bases (1.02%)                                              | 0 mismatches/1758 bases (0%)                                            | 1 mismatches/1757 bases (0.06%)           | CC1                            |
| <b>Q5HE25</b>  | 13 mismatches/1194 bases (1.09%)                                              | 2 mismatches/1194 bases (0.17%)                                         | 1 mismatches/1194 bases (0.08%)           | CC1                            |
| <i>rhbC2</i>   | 16 mismatches/1977 bases (0.81%)                                              | 0 mismatches/1977 bases (0%)                                            | 0 mismatches/1977 bases (0%)              | CC1                            |
| <i>asp23</i>   | 12 mismatches/510 bases (2.35%)                                               | 1 mismatches/510 bases (0.2%)                                           | 0 mismatches/510 bases (0%)               | CC1                            |
| <b>DUF2273</b> | 0 mismatches/240 bases (0%)                                                   | 0 mismatches/240 bases (0%)                                             | 0 mismatches/240 bases (0%)               | CC1 or CC80                    |
| <b>Q5HE21</b>  | 1 mismatches/549 bases (0.18%)                                                | 2 mismatches/549 bases (0.36%)                                          | 0 mismatches/549 bases (0%)               | CC1 or CC80                    |
| <i>opuD2</i>   | 20 mismatches/1563 bases (1.28%)                                              | 0 mismatches/1563 bases (0%)                                            | 0 mismatches/1563 bases (0%)              | CC1                            |
| <b>Q5HE19</b>  | 0 mismatches/1008 bases (0%)                                                  | 0 mismatches/1008 bases (0%)                                            | 0 mismatches/1008 bases (0%)              | CC1 or CC80                    |
| <i>gorA</i>    | 6 mismatches/1002 bases (0.6%)                                                | 0 mismatches/1002 bases (0%)                                            | 0 mismatches/1002 bases (0%)              | CC1                            |
| <b>DUF915</b>  | 1 mismatches/870 bases (0.11%)                                                | 1 mismatches/870 bases (0.11%)                                          | 0 mismatches/870 bases (0%)               | CC1 or CC80                    |
| <i>lacG</i>    | 2 mismatches/1413 bases (0.14%)                                               | 0 mismatches/1413 bases (0%)                                            | 0 mismatches/1413 bases (0%)              | CC1                            |
| <i>lacE</i>    | 0 mismatches/1719 bases (0%)                                                  | 10 mismatches/1719 bases (0.58%)                                        | 0 mismatches/1719 bases (0%)              | CC1 or CC80                    |
| <i>lacF</i>    | 6 mismatches/312 bases (1.92%)                                                | 0 mismatches/312 bases (0%)                                             | 0 mismatches/312 bases (0%)               | CC1                            |
| <i>lacD</i>    | 20 mismatches/981 bases (2.04%)                                               | 1 mismatches/981 bases (0.1%)                                           | 0 mismatches/981 bases (0%)               | CC1                            |
| <i>lacC</i>    | 4 mismatches/933 bases (0.43%)                                                | 4 mismatches/933 bases (0.43%)                                          | 0 mismatches/933 bases (0%)               | CC1 or CC80                    |
| <i>lacB</i>    | 4 mismatches/516 bases (0.78%)                                                | 3 mismatches/516 bases (0.58%)                                          | 0 mismatches/516 bases (0%)               | CC1                            |
| <i>lacA</i>    | 6 mismatches/429 bases (1.4%)                                                 | 0 mismatches/429 bases (0%)                                             | 0 mismatches/429 bases (0%)               | CC1                            |
| <b>tx_lacR</b> | 5 mismatches/68 bases (7.35%)                                                 | 0 mismatches/68 bases (0%)                                              | 0 mismatches/68 bases (0%)                | CC1                            |
| <i>lacR</i>    | 6 mismatches/756 bases (0.79%)                                                | 0 mismatches/756 bases (0%)                                             | 0 mismatches/756 bases (0%)               | CC1                            |
| <i>cobB</i>    | 5 mismatches/732 bases (0.68%)                                                | 5 mismatches/732 bases (0.68%)                                          | 0 mismatches/732 bases (0%)               | CC1 or CC80                    |

|                    | <b>Comparison of ANR570100 to CC80 reference sequence 11819-97 (CP003194)</b> | <b>Comparison of ANR570100 to CC1 reference sequence MW2 (BA000033)</b> | <b>Comparison of ANR570100 to 02T-671</b> | <b>Provenance in ANR570100</b>  |
|--------------------|-------------------------------------------------------------------------------|-------------------------------------------------------------------------|-------------------------------------------|---------------------------------|
| <b>D9RC03</b>      | <i>Absent from CP003194 (100%)</i>                                            | 0 mismatches/98 bases (0%)                                              | 0 mismatches/98 bases (0%)                | CC1                             |
| <b>DUF3885</b>     | <i>Absent from CP003194 (100%)</i>                                            | 14 mismatches/609 bases (2.3%)                                          | 14 mismatches/609 bases (2.3%)            | Unknown, but other than CC80    |
| <b>D9RC05</b>      | <i>Absent from CP003194 (100%)</i>                                            | 0 mismatches/249 bases (0%)                                             | 0 mismatches/249 bases (0%)               | CC1                             |
| <b>Q5HE05</b>      | <i>Absent from CP003194 (100%)</i>                                            | 0 mismatches/126 bases (0%)                                             | 0 mismatches/126 bases (0%)               | CC1                             |
| <b>yvgN2</b>       | 6 mismatches/849 bases (0.71%)                                                | 0 mismatches/849 bases (0%)                                             | 0 mismatches/849 bases (0%)               | CC1                             |
| <b>adhR</b>        | 2 mismatches/417 bases (0.48%)                                                | 0 mismatches/417 bases (0%)                                             | 0 mismatches/417 bases (0%)               | CC1                             |
| <b>hysA</b>        | 201 mismatches/2434 bases (8.19%)                                             | 0 mismatches/2448 bases (0%)                                            | 1 mismatches/2448 bases (0.04%)           | CC1                             |
| <b>att_nyEtd</b>   | <i>Absent from ANR570100</i>                                                  | <i>Absent from ANR570100 and MW2</i>                                    | <i>Absent from ANR570100 and 02T-671</i>  | Absent (as in CC1, unlike CC80) |
| <b>hsdS-etd</b>    | <i>Absent from ANR570100</i>                                                  | <i>Absent from ANR570100 and MW2</i>                                    | <i>Absent from ANR570100 and 02T-671</i>  | Absent (as in CC1, unlike CC80) |
| <b>hsdM</b>        | <i>Absent from ANR570100</i>                                                  | <i>Absent from ANR570100 and MW2</i>                                    | <i>Absent from ANR570100 and 02T-671</i>  | Absent (as in CC1, unlike CC80) |
| <b>etD</b>         | <i>Absent from ANR570100</i>                                                  | <i>Absent from ANR570100 and MW2</i>                                    | <i>Absent from ANR570100 and 02T-671</i>  | Absent (as in CC1, unlike CC80) |
| <b>F3TKB7-var1</b> | <i>Absent from ANR570100</i>                                                  | <i>Absent from ANR570100 and MW2</i>                                    | <i>Absent from ANR570100 and 02T-671</i>  | Absent (as in CC1, unlike CC80) |
| <b>edinB</b>       | <i>Absent from ANR570100</i>                                                  | <i>Absent from ANR570100 and MW2</i>                                    | <i>Absent from ANR570100 and 02T-671</i>  | Absent (as in CC1, unlike CC80) |
| <b>F5W4X2</b>      | <i>Absent from ANR570100</i>                                                  | <i>Absent from ANR570100 and MW2</i>                                    | <i>Absent from ANR570100 and 02T-671</i>  | Absent (as in CC1, unlike CC80) |
| <b>att_nyEtd</b>   | <i>Absent from ANR570100</i>                                                  | <i>Absent from ANR570100 and MW2</i>                                    | <i>Absent from ANR570100 and 02T-671</i>  | Absent (as in CC1, unlike CC80) |
| <b>Q5HE00</b>      | <i>Absent from ANR570100</i>                                                  | <i>Absent from ANR570100 and MW2</i>                                    | <i>Absent from ANR570100 and 02T-671</i>  | Absent (as in CC1, unlike CC80) |
| <b>eapH-1</b>      | 6 mismatches/426 bases (1.41%)                                                | 0 mismatches/426 bases (0%)                                             | 0 mismatches/426 bases (0%)               | CC1                             |
| <b>alsD-L1</b>     | 12 mismatches/705 bases (1.7%)                                                | 0 mismatches/705 bases (0%)                                             | 0 mismatches/705 bases (0%)               | CC1                             |
| <b>alsS</b>        | 32 mismatches/1665 bases (1.92%)                                              | 0 mismatches/1665 bases (0%)                                            | 0 mismatches/1665 bases (0%)              | CC1                             |
| <b>Q8NVB9</b>      | 4 mismatches/183 bases (2.19%)                                                | 0 mismatches/183 bases (0%)                                             | 0 mismatches/183 bases (0%)               | CC1                             |
| <b>rpsI</b>        | 0 mismatches/399 bases (0%)                                                   | 0 mismatches/399 bases (0%)                                             | 0 mismatches/399 bases (0%)               | CC1 or CC80                     |
| <b>rplM</b>        | 1 mismatches/438 bases (0.23%)                                                | 1 mismatches/438 bases (0.23%)                                          | 1 mismatches/438 bases (0.23%)            | CC1 or CC80                     |
| <b>L13_leader</b>  | 0 mismatches/70 bases (0%)                                                    | 0 mismatches/70 bases (0%)                                              | 0 mismatches/70 bases (0%)                | CC1 or CC80                     |
| <b>truA</b>        | 14 mismatches/804 bases (1.74%)                                               | 0 mismatches/804 bases (0%)                                             | 0 mismatches/804 bases (0%)               | CC1                             |
| <b>ecfT</b>        | 6 mismatches/807 bases (0.74%)                                                | 0 mismatches/807 bases (0%)                                             | 0 mismatches/807 bases (0%)               | CC1                             |
| <b>ecfA1</b>       | 6 mismatches/861 bases (0.7%)                                                 | 0 mismatches/861 bases (0%)                                             | 0 mismatches/861 bases (0%)               | CC1                             |
| <b>ecfA2</b>       | 8 mismatches/810 bases (0.99%)                                                | 0 mismatches/810 bases (0%)                                             | 0 mismatches/810 bases (0%)               | CC1                             |
| <b>rplQ</b>        | 0 mismatches/369 bases (0%)                                                   | 0 mismatches/369 bases (0%)                                             | 0 mismatches/369 bases (0%)               | CC1 or CC80                     |
| <b>rpoA</b>        | 0 mismatches/945 bases (0%)                                                   | 0 mismatches/945 bases (0%)                                             | 0 mismatches/945 bases (0%)               | CC1 or CC80                     |
| <b>rpsK</b>        | 1 mismatches/390 bases (0.26%)                                                | 0 mismatches/390 bases (0%)                                             | 0 mismatches/390 bases (0%)               | CC1 or CC80                     |
| <b>rpsM</b>        | 0 mismatches/366 bases (0%)                                                   | 0 mismatches/366 bases (0%)                                             | 0 mismatches/366 bases (0%)               | CC1 or CC80                     |
| <b>rpmJ</b>        | 0 mismatches/114 bases (0%)                                                   | 0 mismatches/114 bases (0%)                                             | 0 mismatches/114 bases (0%)               | CC1 or CC80                     |
| <b>infA</b>        | 0 mismatches/219 bases (0%)                                                   | 0 mismatches/219 bases (0%)                                             | 0 mismatches/219 bases (0%)               | CC1 or CC80                     |
| <b>adk</b>         | 0 mismatches/648 bases (0%)                                                   | 2 mismatches/648 bases (0.31%)                                          | 0 mismatches/648 bases (0%)               | CC1 or CC80                     |
| <b>secYI</b>       | 1 mismatches/1293 bases (0.08%)                                               | 1 mismatches/1293 bases (0.08%)                                         | 0 mismatches/1293 bases (0%)              | CC1 or CC80                     |
| <b>rplO</b>        | 1 mismatches/441 bases (0.23%)                                                | 0 mismatches/441 bases (0%)                                             | 0 mismatches/441 bases (0%)               | CC1 or CC80                     |
| <b>rpmD</b>        | 0 mismatches/180 bases (0%)                                                   | 0 mismatches/180 bases (0%)                                             | 0 mismatches/180 bases (0%)               | CC1 or CC80                     |
| <b>rpsE</b>        | 0 mismatches/501 bases (0%)                                                   | 0 mismatches/501 bases (0%)                                             | 0 mismatches/501 bases (0%)               | CC1 or CC80                     |
| <b>rplR</b>        | 0 mismatches/360 bases (0%)                                                   | 0 mismatches/360 bases (0%)                                             | 0 mismatches/360 bases (0%)               | CC1 or CC80                     |

|             | <b>Comparison of ANR570100 to CC80 reference sequence 11819-97 (CP003194)</b> | <b>Comparison of ANR570100 to CC1 reference sequence MW2 (BA000033)</b> | <b>Comparison of ANR570100 to 02T-671</b> | <b>Provenance in ANR570100</b> |
|-------------|-------------------------------------------------------------------------------|-------------------------------------------------------------------------|-------------------------------------------|--------------------------------|
| <i>rplF</i> | 0 mismatches/537 bases (0%)                                                   | 0 mismatches/537 bases (0%)                                             | 0 mismatches/537 bases (0%)               | CC1 or CC80                    |
| <i>rpsH</i> | 0 mismatches/399 bases (0%)                                                   | 1 mismatches/399 bases (0.25%)                                          | 0 mismatches/399 bases (0%)               | CC1 or CC80                    |
| <i>rpsZ</i> | 0 mismatches/186 bases (0%)                                                   | 0 mismatches/186 bases (0%)                                             | 0 mismatches/186 bases (0%)               | CC1 or CC80                    |
| <i>rplE</i> | 0 mismatches/540 bases (0%)                                                   | 0 mismatches/540 bases (0%)                                             | 1 mismatches/540 bases (0.19%)            | CC1 or CC80                    |
| <i>rplX</i> | 0 mismatches/318 bases (0%)                                                   | 0 mismatches/318 bases (0%)                                             | 0 mismatches/318 bases (0%)               | CC1 or CC80                    |
| <i>rplN</i> | 0 mismatches/369 bases (0%)                                                   | 0 mismatches/369 bases (0%)                                             | 0 mismatches/369 bases (0%)               | CC1 or CC80                    |
| <i>rpsQ</i> | 0 mismatches/264 bases (0%)                                                   | 0 mismatches/264 bases (0%)                                             | 0 mismatches/264 bases (0%)               | CC1 or CC80                    |
| <i>rpmC</i> | 0 mismatches/210 bases (0%)                                                   | 0 mismatches/210 bases (0%)                                             | 0 mismatches/210 bases (0%)               | CC1 or CC80                    |

**Figure 1:** Schematic diagram of the genomes of 02T567 (outer circle), ANR570100 (middle circle) and the reference genome CC80, 11819-97, GenBank CP003194.1 (inner circle). Genomic fragments are colour-coded depending on their origin.

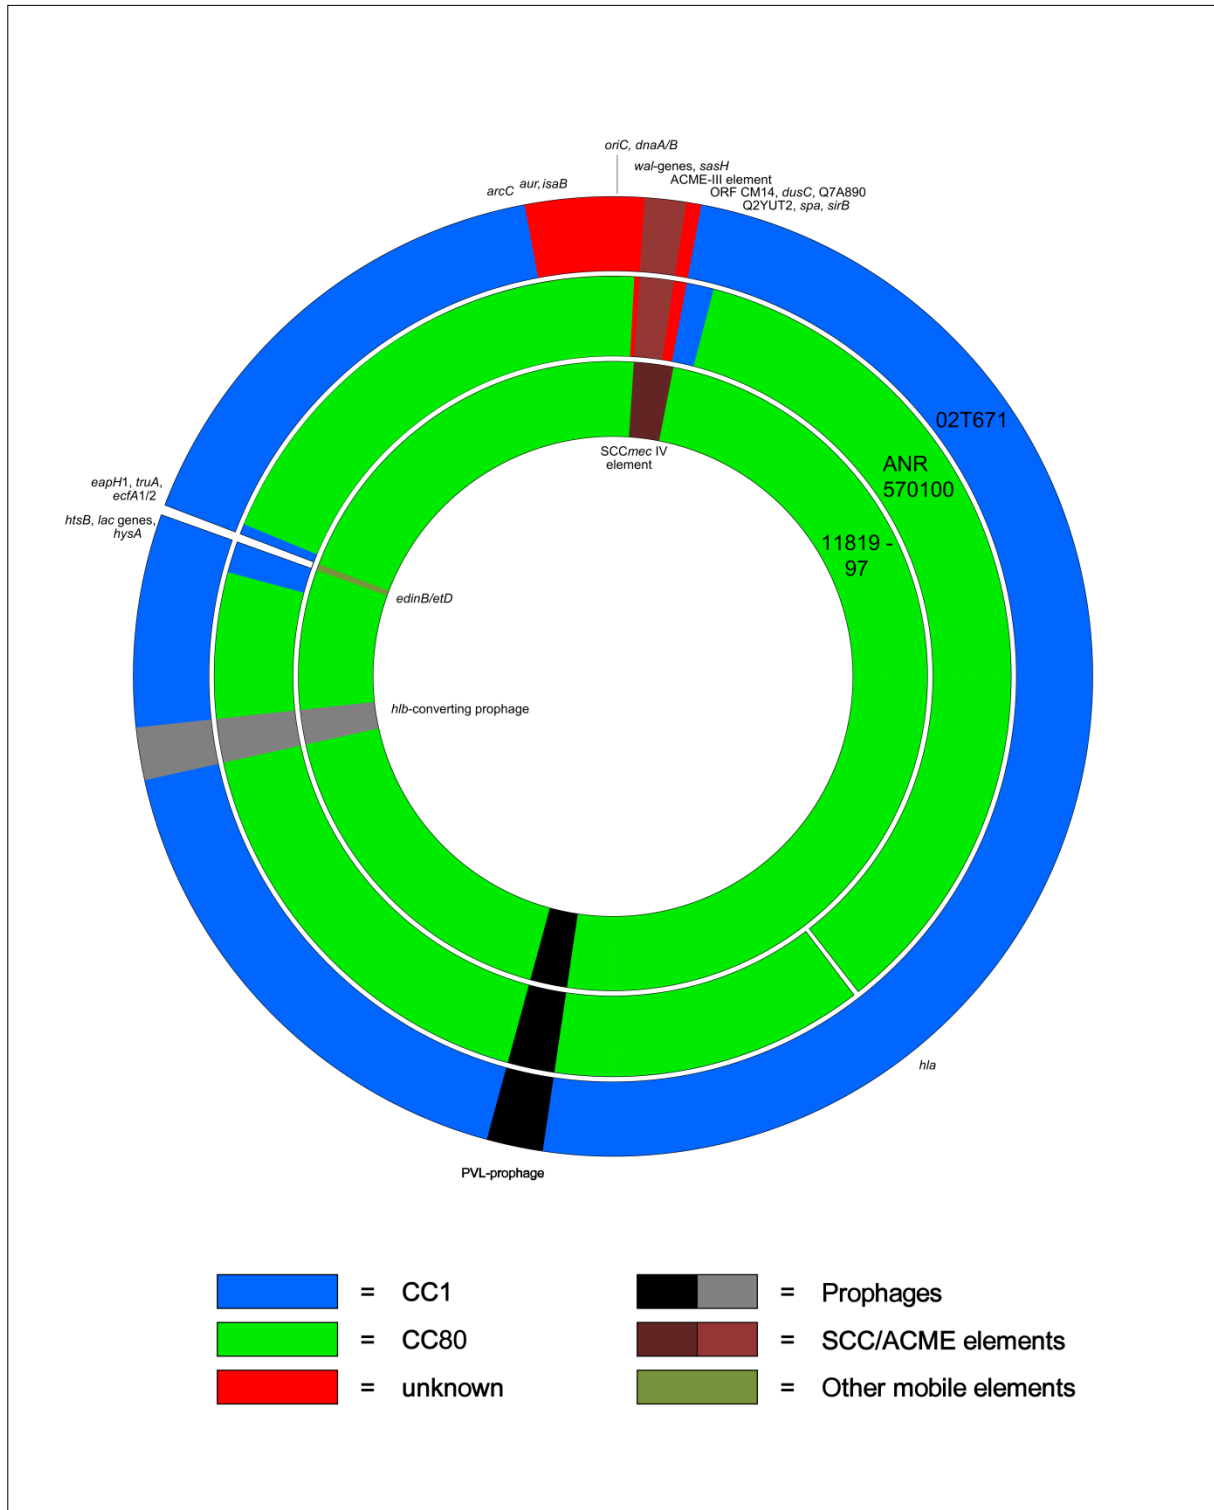

Source: https://www.biorxiv.org/content/10.1101/2020.04.08.031591v1.full.pdf
